# Supplementary material for: Erythrocyte intracellular Mg2+ concentration as an index of recognition and memory
Source: PubMed Central journal article supplement (PMC4890594; doi:10.1038/srep26975), 2016-06-02
Supplement: srep26975-s1.pdf [file srep26975-s1.pdf]

# **Erythrocyte intracellular Mg<sup>2+</sup> concentration as an index of recognition and memory**

Wenxiang XIONG, Yaru LIANG, Xue LI, Guosong LIU, Zhao WANG\*

MOE Key Laboratory of Protein Sciences, Department of Pharmacology, School of  
Medicine, Tsinghua University, Beijing 100084, P.R. China

\* Correspondence and requests for materials should be addressed to Dr. Zhao WANG at  
Department of Pharmacology, School of Medicine, Tsinghua University, Beijing 100084,  
P.R. China.

E-mail: [zwang@tsinghua.edu.cn](mailto:zwang@tsinghua.edu.cn)

Phone: +86 10 6277 2240; Fax: +86 10 6277 2675

## Supplementary information

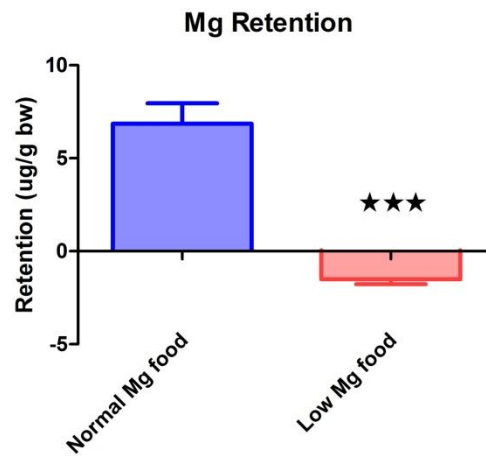

**Supplementary Figure S1: Mg<sup>2+</sup> intake deficiency induced a decrease in body Mg retention.** The Mg retention (method see below) in low Mg<sup>2+</sup> diet group dramatically dropped from positive to a negative value, indicating a Mg<sup>2+</sup> loss from body.

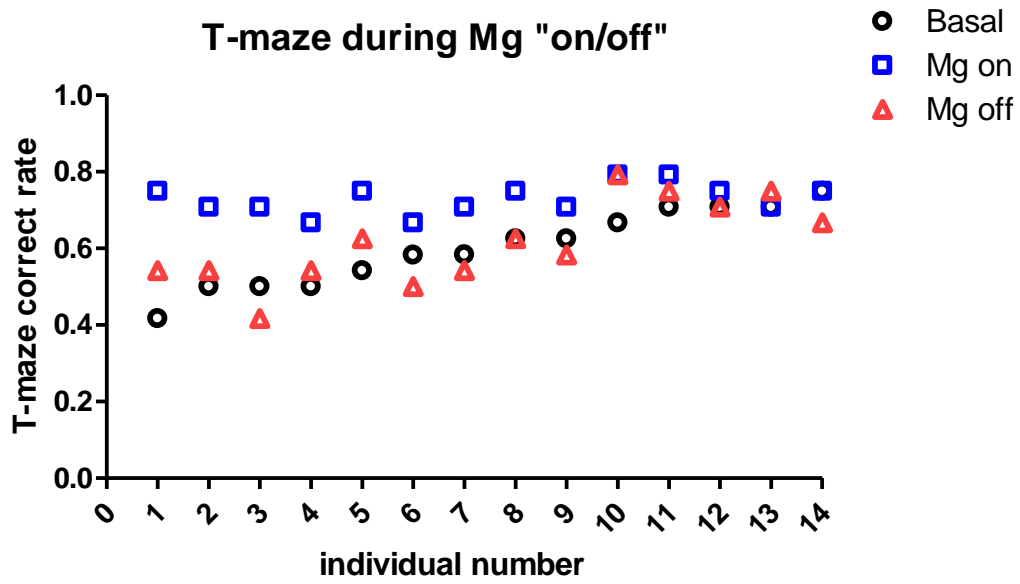

**Supplementary Figure S2: Administration of MgT showed less effect on aged rats with higher basal memory status.** The x-Axis represents individual rat numbers, which were arranged in ascending order based on their basal values (black).

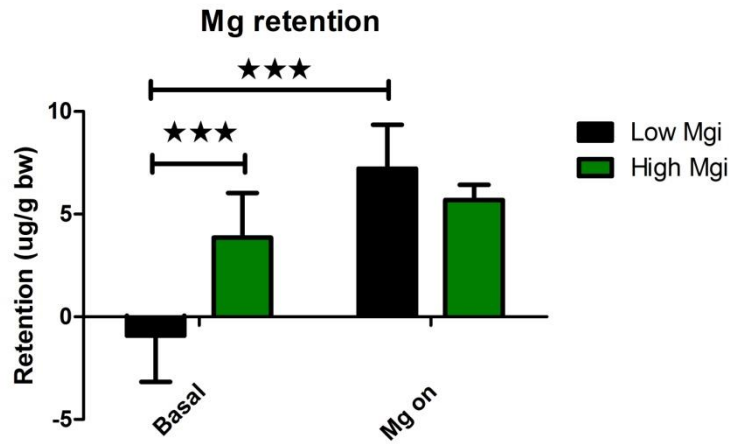

**Supplementary Figure S3: Effect of MgT treatment on body Mg retention.** Rats were divided into low and normal groups according to their basal RBC  $[Mg^{2+}]_i$  values. During MgT treatment, RBC  $[Mg^{2+}]_i$  was regulated by body Mg retention efficiency. Only Mg retention in the low RBC  $[Mg^{2+}]_i$  group showed strong response to MgT treatment. Data are presented as mean  $\pm$  SD. Two-way ANOVA was followed by Bonferroni's *post hoc* test, \*\*\* $p$ <0.001.

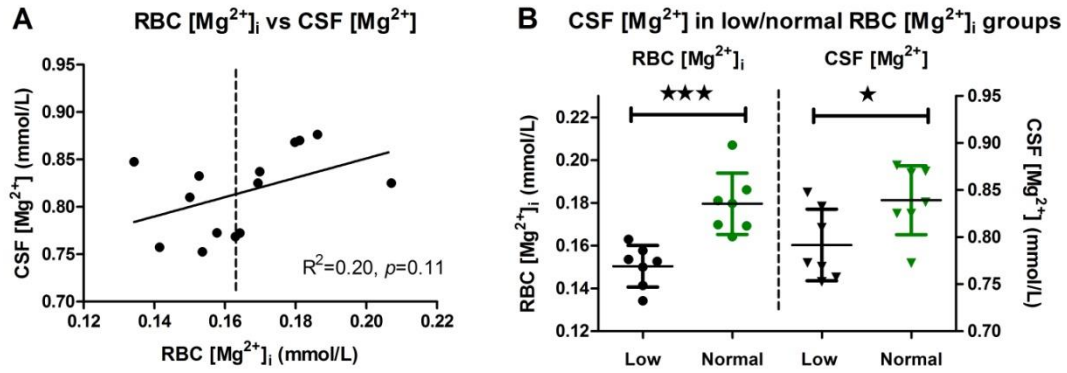

**Supplementary Figure S4: Correlation between RBC [Mg<sup>2+</sup>]<sub>i</sub> and CSF [Mg<sup>2+</sup>]. (A)**

Linear correlation analysis between RBC [Mg<sup>2+</sup>]<sub>i</sub> and CSF [Mg<sup>2+</sup>] in aged rats ( $n=14$ )

(dotted line, rats were divided into normal and low groups according to their RBC

[Mg<sup>2+</sup>]<sub>i</sub> values). (B) Comparison of CSF [Mg<sup>2+</sup>]<sub>i</sub> based on individual RBC [Mg<sup>2+</sup>]<sub>i</sub>

levels. Unpaired  $t$  test,  $*p<0.05$ ,  $***p<0.001$ .

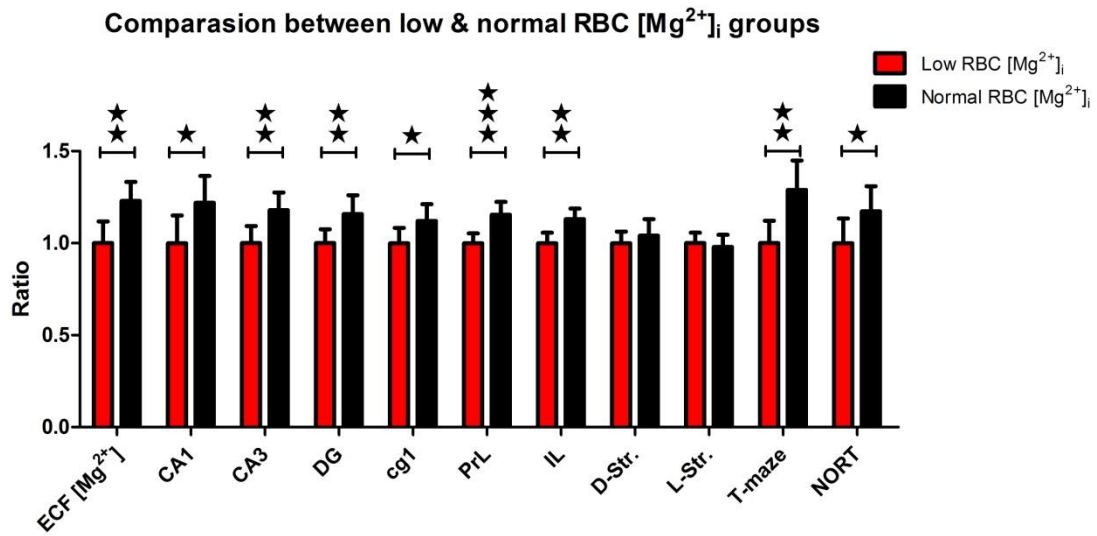

**Supplementary Figure S5: Differentiation of  $[Mg^{2+}]_i$ , synapse density, and memory levels based on individual RBC  $[Mg^{2+}]_i$  values.** Significant differences between low RBC  $[Mg^{2+}]_i$  group and normal RBC  $[Mg^{2+}]_i$  group were shown. Data are presented as mean  $\pm$  SD. Unpaired t test, \* $p < 0.05$ , \*\* $p < 0.01$ , \*\*\* $p < 0.001$ .

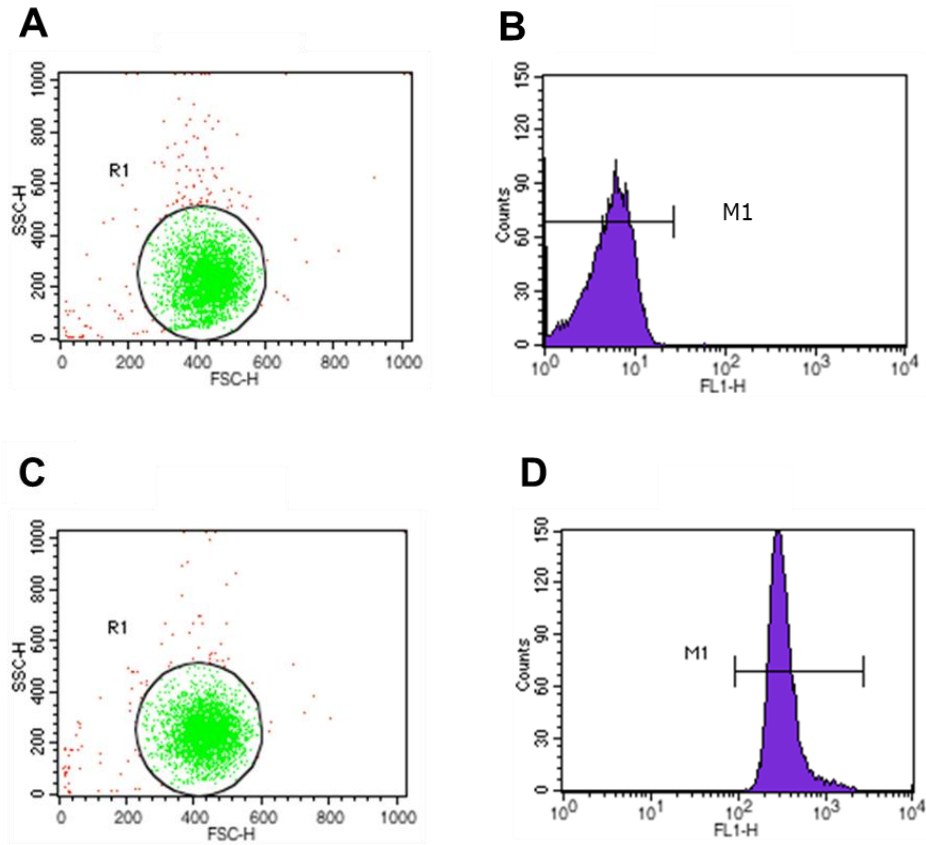

**Supplementary Figure S6: The flow cytometry images of Mag staining in erythrocyte.** (A) The forward scatter (FSC)/side scatter (SSC) image of an erythrocyte sample incubated without Mag dye (control). (B) The FL1/counts image of the control. (C) and (D), the FSC/SSC and FL1/counts images of the same erythrocyte sample incubated with Mag dye loading.

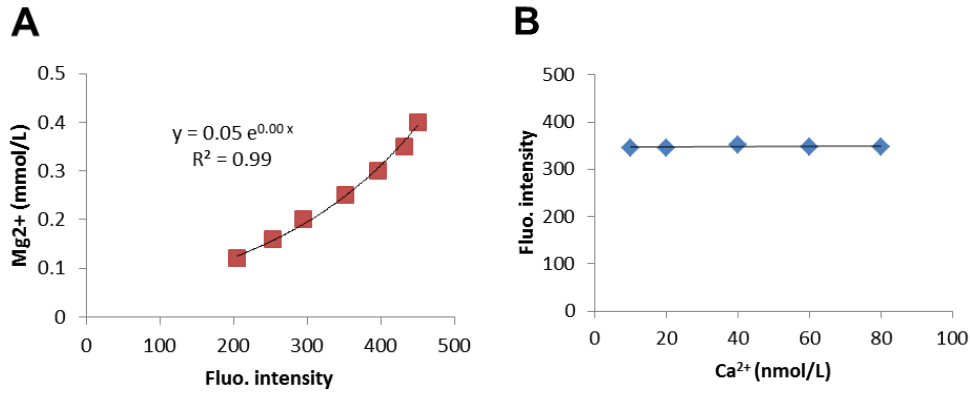

**Supplementary Figure S7: The calibration of MaG fluorescence intensity.** (A) A fitted curve was built using fluorescence intensity as x-axis and standard [Mg<sup>2+</sup>]<sub>i</sub> as y-axis. The real RBC [Mg<sup>2+</sup>]<sub>i</sub> in each sample was calculated by inputting the fluorescence intensity value to the fitting formula. (B) The influence of [Ca<sup>2+</sup>]<sub>i</sub> changes to MaG fluorescence was evaluated by incubating the erythrocytes with [Ca<sup>2+</sup>]<sub>i</sub> gradient (similar as [Mg<sup>2+</sup>]<sub>i</sub> calibration, with fixed [Mg<sup>2+</sup>]<sub>i</sub> = 0.25mM) and comparing the related fluorescence. There was not Ca<sup>2+</sup> influence in erythrocyte at physiological level.



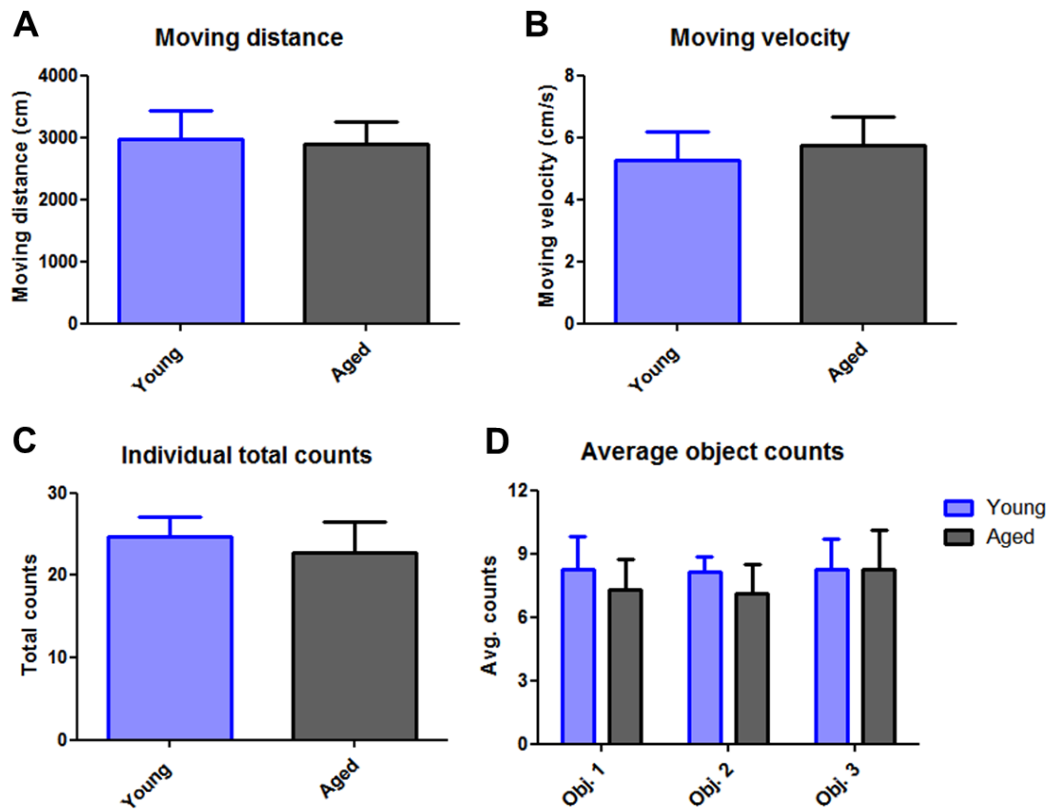

**Supplementary Figure S8: Rats did not show age related deficits in motor abilities, explorative abilities and object preference.** The total moving distance (A) and velocity (B) were measured in the habituation phase. There were no differences between young and aged rats (the same rats as Fig. 2~6; n=7/group). (C) In the sample phase, the total counts of all the 3 objects for each rat were calculated. There were no differences between young and aged rats, suggesting similar explorative abilities between the 2 groups. (D) Also in the sample phase, the number of counts for each object was compared. There were not significant differences among the average counts of the 3 objects, both in young and aged groups. It suggested that there was not an object preference which may interfere the experiment (rats explore one object much more/less than the other objects in the sample phase).

**Mg retention procedure:**

To assess Mg retention, animals were individually housed in metabolic cages. Animals received either normal food or Mg deficient food, with either deionized water or water containing MgT. After 3 days of habituation, urine and fecal pellets from each rat were collected on a daily basis over a continuous five-day-period. Food in each cage was weighed every day to calculate the daily Mg intake. Rats were weighed. The urine and fecal pellets were analyzed for Mg content using ICP-AES.

The percentage of retention was estimated using the following equation:

$$\text{Mg Retention} = \frac{\text{Mg}_{\text{intake}} - \text{Mg}_{\text{feces}} - \text{Mg}_{\text{urine}}}{\text{Body weight}} \quad \text{Supplementary Equation S (1)}$$

**Supplementary Table S1: Mg detection in tissues**

| Research field                    | Species | Assay tech.* | Liver | Kidney | Heart | Muscle | Muscle ionized | Brain | Brain ionized | Skeleton | Intestine | Reference |
|-----------------------------------|---------|--------------|-------|--------|-------|--------|----------------|-------|---------------|----------|-----------|-----------|
| Alzheimer's Disease               | Human   | ICP-AES      |       |        |       |        |                | √     |               |          |           | 1         |
| Congestive heart failure          | Human   | AAS          |       |        | ×     | ×      |                |       |               |          |           | 2         |
| Genetic low Mg, Mg deficient food | Mouse   | AAS          |       | √      |       |        |                |       |               | √        |           | 3         |
| Hypertension, Aging               | Human   | NMR          |       |        |       |        | √              |       | √             |          |           | 4         |
| Induced hypertension              | Rat     | AAS          | ×     | √      | √     |        |                | √     |               |          |           | 5         |
| Mg deficient food                 | Rat     | AAS          | ×     | ×      | ×     | ×      |                | ×     |               | √        |           | 6         |
| Mg deficient food                 | Rat     | MAPP         | ×     | ×      | ×     | ×      |                | ×     |               | √        | √         | 7         |
| Migraine                          | Human   | NMR          |       |        |       |        |                |       | √             |          |           | 8         |
| Preeclampsia                      | Human   | NMR          |       |        |       |        | √              |       | √             |          |           | 9         |
| Traumatic brain injury            | Rat     | NMR          |       |        |       |        |                |       | √             |          |           | 10        |

√ and × show the Mg indexes that have been tested in each research. √ means the Mg index effectively responding to the modification of experimental conditions.

× means no response.

\*, please see abbreviations as below:

AAS, atomic absorption spectroscopy; ICP-AES, inductively coupled plasma atomic emission spectrometry; MAPP, Magnesium ammonium phosphate precipitate; NMR, nuclear magnetic resonance.

**Supplementary Table S2: Mg detection in blood cells**

| Research field                    | Species | Assay tech.* | CSF | Urine | Serum | Plasma | Plasma ionized | RBC ionized | RBC membrane | RBC total | Lymphocyte total | Lymphocyte ionized | Platelet total | 24h retention | Reference |
|-----------------------------------|---------|--------------|-----|-------|-------|--------|----------------|-------------|--------------|-----------|------------------|--------------------|----------------|---------------|-----------|
| Aging, hypertension, diabetes     | Human   | NMR          |     |       |       |        |                | √           |              |           |                  |                    |                |               | 11        |
| Angina                            | Human   | CC, AAS      |     | √     | ×     |        |                |             |              | √         | √                |                    |                | √             | 12        |
| Anxiety/stress                    | Human   | AES          |     | √     |       |        |                |             |              |           |                  |                    |                |               | 13        |
| Congestive heart failure          | Human   | AAS          |     |       | ×     |        |                |             |              |           | ×                |                    |                |               | 2         |
| Diabetes                          | Human   | NMR          |     |       |       |        |                | √           |              |           |                  |                    |                |               | 14        |
| Genetic low Mg, Mg deficient food | Mouse   | AAS          |     | √     |       | √      |                |             |              | √         |                  |                    |                |               | 3         |
| Hemodialysis                      | Human   | AAS, ISE, FP |     |       |       | √      | √              |             |              | √         | √                | √                  |                |               | 15        |
| Hypertension                      | Human   | AAS          |     |       |       | ×      |                |             | √            | ×         |                  |                    |                |               | 16        |
| Hypertension                      | Human   | FP           |     |       |       |        |                |             |              |           |                  | ×                  |                |               | 17        |
| Hypertension                      | Human   | NMR          |     |       |       | ×      |                | √           |              |           |                  |                    |                |               | 18        |
| Hypertension                      | Human   | NMR          |     |       |       |        |                | √           |              |           |                  |                    |                |               | 19        |
| Hypertension                      | Human   | NMR          |     |       |       |        |                | √           |              |           |                  |                    |                |               | 20        |
| Hypertension                      | Human   | FP           |     |       |       |        |                |             |              |           |                  | ×                  |                |               | 21        |
| Hypertension, insulin inducement  | Human   | AAS, NMR     |     |       |       |        |                | √           |              | √         |                  |                    |                |               | 22        |
| Hypertension, obesity             | Human   | DCPS         |     |       |       | ×      |                |             |              | √         |                  |                    | √              |               | 23        |

| Research field          | Species | Assay tech.*    | CSF | Urine | Serum | Plasma | Plasma ionized | RBC ionized | RBC membrane | RBC total | Lymphocyte total | Lymphocyte ionized | Platelet total | 24h retention | Reference |
|-------------------------|---------|-----------------|-----|-------|-------|--------|----------------|-------------|--------------|-----------|------------------|--------------------|----------------|---------------|-----------|
| Hypomagnese-mia         | Human   | AAS             |     |       | √     |        |                |             |              |           |                  | ×                  |                |               | 24        |
| Induced hypertension    | Rat     | AAS             |     |       |       |        |                |             |              | √         |                  |                    |                |               | 5         |
| Insulin inducement      | Human   | NMR             |     |       |       |        |                | √           |              |           |                  |                    |                |               | 25        |
| Maternal and cord blood | Human   | NMR, ISE        |     |       |       |        | √              | √           |              |           |                  |                    |                |               | 26        |
| Mg deficient food       | Rat     | AAS             |     |       |       | √      |                |             |              |           |                  |                    |                |               | 6         |
| Mg deficient food       | Rat     | MAPP            |     |       | √     |        |                |             |              |           |                  |                    |                |               | 7         |
| Mg deficient food       | Rat     | CC              |     |       |       | √      |                |             |              |           |                  |                    |                |               | 27        |
| Mg deficient food       | Calve   | AAS             | √   |       |       | √      |                |             |              | √         |                  |                    |                |               | 28        |
| Mg deficient food       | Rat     | Isotope, ICP-MS |     |       |       | √      | √              |             |              | √         | ×                |                    | ×              |               | 29        |
| Migraine                | Human   | AAS, FP         |     |       |       | ×      |                |             |              | √         | ×                | √                  |                |               | 30        |
| Oral Mg treat           | Rat     | CC              | √   |       |       |        |                |             |              |           |                  |                    |                |               | 31        |
| Sleep deprivation       | Rat     | AAS, ISE        |     |       |       | ×      | √              |             |              |           |                  |                    |                |               | 32        |

√ and × show the Mg indexes that have been tested in each research. √ means the Mg index effectively responding to the modification of experimental conditions.

× means no response.

\*, please see abbreviations as below:

AAS, atomic absorption spectroscopy; AES, atomic emission spectrometry; CC, calmagite chromometry; DCPS, direct current plasma spectrometer; FP, fluorescence probe; ICP-MS, inductively coupled plasma mass spectrometry; ISE, ion-selective electrode; MAPP, Magnesium ammonium phosphate precipitate; NMR, nuclear

magnetic resonance.

## References

1. Andrasi, E., Pali, N., Molnar, Z. & Kosel, S. Brain aluminum, magnesium and phosphorus contents of control and Alzheimer-diseased patients. *J Alzheimers Dis* **7**, 273-284 (2005).
2. Ralston, M.A. *et al.* Magnesium content of serum, circulating mononuclear cells, skeletal muscle, and myocardium in congestive heart failure. *Circulation* **80**, 573-580 (1989).
3. Feillet-Coudray, C. *et al.* Magnesium metabolism in mice selected for high and low erythrocyte magnesium levels. *Metabolism* **53**, 660-665 (2004).
4. Resnick, L.M. *et al.* Direct magnetic resonance determination of aortic distensibility in essential hypertension: relation to age, abdominal visceral fat, and in situ intracellular free magnesium. *Hypertension* **30**, 654-659 (1997).
5. Senturk, U.K., Kaputlu, I., Gunduz, F., Kuru, O. & Gokalp, O. Tissue and blood levels of zinc, copper, and magnesium in nitric oxide synthase blockade-induced hypertension. *Biol Trace Elem Res* **77**, 97-106 (2000).
6. Martindale, L. & Heaton, F.W. Magnesium deficiency in the adult rat. *Biochem J* **92**, 119-126 (1964).
7. Watchorn, E. & McCance, R.A. Subacute magnesium deficiency in rats. *Biochem J* **31**, 1379-1390 (1937).
8. Lodi, R. *et al.* Deficit of brain and skeletal muscle bioenergetics and low brain magnesium in juvenile migraine: an in vivo <sup>31</sup>P magnetic resonance spectroscopy interictal study. *Pediatr Res* **42**, 866-871 (1997).
9. Resnick, L.M. *et al.* Cellular-free magnesium depletion in brain and muscle of normal and preeclamptic pregnancy: a nuclear magnetic resonance spectroscopic study. *Hypertension* **44**, 322-326 (2004).
10. Heath, D.L. & Vink, R. Optimization of magnesium therapy after severe diffuse axonal brain injury in rats. *J Pharmacol Exp Ther* **288**, 1311-1316 (1999).
11. Barbagallo, M., Gupta, R.K., Dominguez, L.J. & Resnick, L.M. Cellular ionic alterations with age: relation to hypertension and diabetes. *J Am Geriatr Soc* **48**, 1111-1116 (2000).
12. Satake, K., Lee, J.D., Shimizu, H., Ueda, T. & Nakamura, T. Relation between severity of magnesium deficiency and frequency of anginal attacks in men with variant angina. *J Am Coll Cardiol* **28**, 897-902 (1996).
13. Grases, G. *et al.* Anxiety and stress among science students. Study of calcium and magnesium alterations. *Magnes Res* **19**, 102-106 (2006).
14. Barbagallo, M., Resnick, L.M., Dominguez, L.J. & Licata, G. Diabetes mellitus, hypertension and ageing: the ionic hypothesis of ageing and cardiovascular-metabolic diseases. *Diabetes Metab* **23**, 281-294 (1997).
15. Huijgen, H.J. *et al.* Intracellular and extracellular blood magnesium fractions in hemodialysis patients; is the ionized fraction a measure of magnesium excess? *Clin Chem* **44**, 639-648 (1998).
16. Kosch, M. *et al.* Alterations in calcium and magnesium content of red cell membranes in patients with primary hypertension. *Am J Hypertens* **14**, 254-258 (2001).

17. Delva, P. *et al.* Intralymphocyte free magnesium and calcium and insulin tolerance test in a group of essential hypertensive patients. *Life Sci* **63**, 1405-1415 (1998).
18. Dominguez, L.J., Barbagallo, M., Sowers, J.R. & Resnick, L.M. Magnesium responsiveness to insulin and insulin-like growth factor I in erythrocytes from normotensive and hypertensive subjects. *J Clin Endocrinol Metab* **83**, 4402-4407 (1998).
19. Resnick, L.M., Gupta, R.K. & Laragh, J.H. Intracellular free magnesium in erythrocytes of essential hypertension: relation to blood pressure and serum divalent cations. *Proc Natl Acad Sci U S A* **81**, 6511-6515 (1984).
20. Resnick, L.M., Gupta, R.K., Gruenspan, H., Alderman, M.H. & Laragh, J.H. Hypertension and peripheral insulin resistance. Possible mediating role of intracellular free magnesium. *Am J Hypertens* **3**, 373-379 (1990).
21. Delva, P.T., Pastori, C., Degan, M., Montesi, G.D. & Lechi, A. Intralymphocyte free magnesium in a group of subjects with essential hypertension. *Hypertension* **28**, 433-439 (1996).
22. Barbagallo, M., Dominguez, L.J., Tagliamonte, M.R., Resnick, L.M. & Paolisso, G. Effects of glutathione on red blood cell intracellular magnesium: relation to glucose metabolism. *Hypertension* **34**, 76-82 (1999).
23. Corica, F. *et al.* Changes in plasma, erythrocyte, and platelet magnesium levels in normotensive and hypertensive obese subjects during oral glucose tolerance test. *Am J Hypertens* **12**, 128-136 (1999).
24. Sacks, G.S. *et al.* Mononuclear blood cell magnesium content and serum magnesium concentration in critically ill hypomagnesemic patients after replacement therapy. *Nutrition* **13**, 303-308 (1997).
25. Barbagallo, M., Gupta, R.K. & Resnick, L.M. Cellular ionic effects of insulin in normal human erythrocytes: a nuclear magnetic resonance study. *Diabetologia* **36**, 146-149 (1993).
26. Bardicéf, M. *et al.* Perinatal cellular ion metabolism: <sup>31</sup>P-nuclear magnetic resonance spectroscopic analysis of intracellular free magnesium and pH in maternal and cord blood erythrocytes. *J Soc Gynecol Investig* **3**, 66-70 (1996).
27. Bardgett, M.E., Schultheis, P.J., McGill, D.L., Richmond, R.E. & Wagge, J.R. Magnesium deficiency impairs fear conditioning in mice. *Brain Res* **1038**, 100-106 (2005).
28. Reynolds, C.K., Bell, M.C. & Sims, M.H. Changes in plasma, red blood cell and cerebrospinal fluid mineral concentrations in calves during magnesium depletion followed by repletion with rectally infused magnesium chloride. *J Nutr* **114**, 1334-1341 (1984).
29. Feillet-Coudray, C., Coudray, C., Gueux, E., Mazur, A. & Rayssiguier, Y. A new in vitro blood load test using a magnesium stable isotope for assessment of magnesium status. *J Nutr* **133**, 1220-1223 (2003).
30. Thomas, J. *et al.* Free and total magnesium in lymphocytes of migraine patients - effect of magnesium-rich mineral water intake. *Clin Chim Acta* **295**, 63-75 (2000).
31. Slutsky, I. *et al.* Enhancement of learning and memory by elevating brain magnesium. *Neuron* **65**, 165-177 (2010).



32. Akanmu, M.A., Meludu, S.C. & Honda, K. Effects of 6-hour total sleep deprivation on plasma magnesium and calcium levels in rats. *Sleep and Biological Rhythms* **1**, 97-100 (2003).
